# Supplementary material
Source: PubMed Central journal article supplement (PMC9361960)
Supplement: 10916_2022_1843_MOESM1_ESM.pdf [file 10916_2022_1843_MOESM1_ESM.pdf]

## Telehealth and the Digital Divide: Identifying Potential Care Gaps in Video Visit Use

Journal of Medical Systems

Hetal Choxi, M.D. <sup>1</sup>

Hans VanDerSchaaf, MPA, Ph.D. <sup>1</sup>

Yihan Li, M.HA.<sup>2</sup>

Emily Morgan, M.D. <sup>1</sup>

<sup>1</sup> Oregon Health and Science University, Portland, OR, USA

<sup>2</sup> University of Michigan, Ann Arbor, MI, USA

Corresponding Author: Hetal Choxi, M.D., [choxi@ohsu.edu](mailto:choxi@ohsu.edu)

### Appendix

*Table S1: Patient and staff interview schedule*

| <b>Interview date<br/>(each interview<br/>30 mins)</b> | <b>Interviewee</b>     | <b>Interviewers</b> |
|--------------------------------------------------------|------------------------|---------------------|
| 6.17.21                                                | Staff participant #1   | A, B, C             |
| 6.18.21                                                | Staff participant #2   | B, C, D             |
| 6.23.21                                                | Staff participant #3   | A, B, C             |
| 6.24.21                                                | Staff participant #4   | A, B, C             |
| 7.6.21                                                 | Patient participant #1 | A, B, C             |
| 7.6.21                                                 | Patient participant #2 | A, B, C             |
| 7.7.21                                                 | Patient participant #3 | A, B, C             |
| 7.7.21                                                 | Patient participant #4 | A, B, C, E          |
| 7.7.21                                                 | Patient participant #5 | A, B, C, E          |
| 7.7.21                                                 | Patient participant #6 | A, B, D             |
| 7.8.21                                                 | Patient participant #7 | A, B, C             |
| 7.8.21                                                 | Patient participant #8 | A, B, C             |
| 7.8.21                                                 | Patient participant #9 | A, B, C             |

Table S2: Patient Interviews Coding Schema

| Category             | Sub-category                   | Code                                                     | Code definition                                                               |
|----------------------|--------------------------------|----------------------------------------------------------|-------------------------------------------------------------------------------|
| Accessing healthcare | Accessing healthcare at clinic | Transportation is barrier                                | Transportation is barrier to coming to clinic                                 |
|                      |                                | Uses medical transport to/from visit                     | Uses medical transport service for transportation to/from visit               |
|                      |                                | Prefers in-person visit                                  | Prefers in-person visit with provider                                         |
|                      |                                | Needs to be convinced to do a visit every time           | Needs to be convinced to do a visit every time                                |
|                      |                                | Only wants to go to clinic if there's a reason           | Only wants to go to clinic if there's a reason to be seen in-person           |
|                      |                                | Negative experiences with medical transport              | Negative experiences with medical transport                                   |
|                      | Interventions                  | Mailing pamphlet would be helpful                        | Mailing pamphlet would be helpful                                             |
|                      |                                | Most comfortable is pamphlet                             | Most comfortable is pamphlet                                                  |
|                      |                                | Most helpful is the mobile to help get technology set up | Most helpful is the mobile to help get technology set up                      |
|                      | Phone visit experiences        | Phone visits are helpful                                 | Phone visits are a helpful way to receive care                                |
|                      |                                | Phone coverage is spotty                                 | Phone coverage is spotty and can impact quality of the visit                  |
|                      |                                | Waited for the phone call an hour before                 | Waited for the phone call an hour before the visit start                      |
|                      |                                | Sent in paperwork prior to phone visit                   | Sent in paperwork prior to phone visit                                        |
|                      |                                | Had phone visit at home                                  | Had phone visit at home                                                       |
|                      |                                | Had phone visit in car                                   | Had phone visit in car                                                        |
|                      |                                | Would have preferred video                               | Would have preferred video                                                    |
|                      |                                | prefers phone visit                                      | Prefers phone visit                                                           |
|                      | Virtual visit experiences      | Don't recall                                             | Doesn't recall if offered virtual visit when called to schedule appointment   |
|                      |                                | Virtual visit transitioned to phone                      | Virtual visit was transitioned to phone due to technical difficulties         |
|                      |                                | Likes phone visits but something missing                 | Likes phone visits but something is missing by not seeing the provider's face |
|                      |                                | Provider requested a phone visit                         | Provider requested a phone visit                                              |
|                      |                                | Virtual would be okay after first visit                  | Virtual would be okay after first visit with provider                         |
|                      |                                | Virtual visits are helpful                               | Virtual visits are a helpful way of accessing care                            |
|                      |                                | Internet access okay                                     | Internet access for visit was sufficient                                      |
|                      |                                | Video call with family or friends                        | Have participated in a video call with family or friends                      |
|                      |                                | Using the video visit technology was fine                | Using the video visit technology was fine                                     |

|                                               |                                                               |                                                      |                                                                    |
|-----------------------------------------------|---------------------------------------------------------------|------------------------------------------------------|--------------------------------------------------------------------|
|                                               |                                                               | Personal presentation                                | Concern about personal presentation if doing a virtual visit       |
|                                               | What would influence to try virtual visit                     | Would do a virtual visit if could use the technology | Would do a virtual visit if could use the technology               |
|                                               |                                                               | If can't make it to office                           | If can't make it to office                                         |
|                                               |                                                               | If had symptoms to show                              | If had symptoms to show                                            |
|                                               |                                                               | Prefers virtual visit                                | Prefers virtual visit                                              |
|                                               |                                                               | Scared of virtual visits                             | Scared of virtual visits                                           |
|                                               |                                                               | Would only do a virtual visit if after hours         | Would only do a virtual visit if after hours                       |
|                                               |                                                               | Would do a virtual visit if provider requested it    | Would do a virtual visit if provider requested it                  |
|                                               |                                                               | Technology                                           | Confidence with technology                                         |
| No one to help                                | No one is available to help with technology                   |                                                      |                                                                    |
| Seems to be reluctance to ask others for help | Seems to be reluctance to ask others for help with technology |                                                      |                                                                    |
| Not sure how to use technology                | Not sure how to use technology                                |                                                      |                                                                    |
| Experiences with technology                   | Value technology                                              |                                                      | Value the benefits of technology                                   |
|                                               | Want to learn about tech                                      |                                                      | Interesting in learning about how to use technology                |
|                                               | Family, caregiver or friend can help with technology          |                                                      | Family or friend can help with using and learning about technology |
|                                               | Using tech can be frustrating                                 |                                                      | Using tech can be frustrating for some                             |
| MyChart access                                | Family or friend has access to MyChart                        |                                                      | Family or friend has access to MyChart                             |
|                                               | No one else has access to MyChart account                     |                                                      | No one else has access to MyChart account                          |
|                                               | Not set up as proxy MyChart user                              |                                                      | Family member not set up as proxy MyChart user                     |
| MyChart awareness                             | Heard about MyChart through clinic                            |                                                      | Patient heard about MyChart through their clinic                   |
|                                               | Can't recall how heard about MyChart                          |                                                      | Can't recall how heard about MyChart                               |
| MyChart experiences                           | Used MyChart past week                                        |                                                      | Used MyChart in the past week                                      |
|                                               | Yes - have MyChart account                                    |                                                      | Has a MyChart account                                              |
|                                               | Like help with MyChart                                        |                                                      | Patient would like help with installing/using MyChart              |
|                                               | Was not successful in using MyChart                           |                                                      | Patient was not successful in installing or using MyChart          |
|                                               | No offer for setting up MyChart                               |                                                      | Patient did not receive an offer for setting up MyChart            |
|                                               | Privacy concerns                                              |                                                      | Privacy concerns related to using technology                       |

|              |                        |                                        |                                                        |
|--------------|------------------------|----------------------------------------|--------------------------------------------------------|
|              | MyChart setup          | Clinic staff helped with MyChart setup | Clinic staff helped with MyChart setup                 |
|              |                        | Setup MyChart on own                   | Patient setup MyChart on their own                     |
|              |                        | No help setting up MyChart             | No help setting up MyChart                             |
| Typical week | Activities             | Basic needs                            | Typical week includes a focus on basic needs           |
|              |                        | Raising children                       | Typical week involves raising children                 |
|              |                        | Caretaking                             | Typical week focuses on caretaking                     |
|              |                        | Medical needs                          | Typical week focused on medical needs                  |
|              |                        | Volunteering                           | Typical week focuses on volunteering                   |
|              |                        | Recreation                             | Typical week focuses on recreation                     |
|              | Caregiver status       | No caregiver                           | No caregiver for help with day-to-day tasks            |
|              |                        | Yes caregiver                          | Caregiver for help with day-to-day tasks               |
|              | Grocery transportation | Walk or bike                           | Walk or bike for getting food                          |
|              |                        | Drive                                  | Drive for getting food                                 |
|              |                        | Caregiver                              | Caregiver gets food                                    |
|              | Living situation       | Rent room                              | Renting room as living situation                       |
|              |                        | Extended family                        | Extended family in living situation                    |
|              |                        | Lives in home                          | Lives in home or mobile home                           |
|              | Worries                | Note safe in neighborhood              | Worry - does not feel safe in neighborhood             |
|              |                        | Worry about money                      | Worried about if enough money to cover expenses        |
|              |                        | Worry about care for partner           | Worry about care for partner if I'm not around         |
|              |                        | Worry about health                     | Worry about health                                     |
|              |                        | Worry about meanness in the world      | Worry about meanness in the world                      |
|              |                        | Worry about home upkeep                | Worry about whether can continue +A4:D79to upkeep home |

Table S3: Staff Interviews Coding Schema

| Category         | Code                                           | Code definition                                                                                                                 |
|------------------|------------------------------------------------|---------------------------------------------------------------------------------------------------------------------------------|
| Patient barriers | Trouble setting up MyChart                     | Some patients are having trouble accessing MyChart                                                                              |
|                  | MyChart challenges - new updates               | Some patients might be having challenges with MyChart due to the new update - not able to find things                           |
|                  | Older patients NOT having challenges with tech | Some say that older patients are NOT having challenges with the tech for virtual visits, at least to the degree that many think |
|                  | Barrier - remembering MyChart password         | Barrier for patients can be remembering their MyChart password                                                                  |
|                  | Barrier - pre check-in process                 | Pre-check in process barriers include updating info if needed, answering Medicare questions, finding e-signature                |

|                            |                                                               |                                                                                                                                                                   |
|----------------------------|---------------------------------------------------------------|-------------------------------------------------------------------------------------------------------------------------------------------------------------------|
|                            | Barrier - turning off pop-up blockers                         | Some patients not sure how to turn off pop-up blockers                                                                                                            |
|                            | Takes a while for patients and clinics to get used to changes | Can be challenging for patients and clinics to work through any changes, such as adding in pre-check-in                                                           |
|                            | Not enough time precheckin                                    | Patients are not allowing enough time for pre-check-in                                                                                                            |
|                            | No computers                                                  | Lots of patients don't have personal computers                                                                                                                    |
|                            | Internet access challenges in rural areas                     | In rural areas, internet access can be challenging for patients                                                                                                   |
|                            | Tech barriers - challenging to describe                       | Patients sometimes have a very hard time explaining the technology barrier they're encountering                                                                   |
|                            | Pre-check-in - not skipping meds                              | Prefer that patients cannot skip the medication names in the pre check-in process                                                                                 |
|                            | unreliable devices or data plans                              | Patient smartphone devices or data plans can be unreliable                                                                                                        |
| Modality considerations    | Older patients - need help with technology                    | Older patients need help with technology                                                                                                                          |
|                            | Marginalized patients - challenges with virtual visits        | Marginalized patients, such as those who need psychiatric help, are having lots of challenges with virtual visits                                                 |
|                            | Patients deciding about modality                              | Clinics decide on if modality will be virtual or phone based on patient preferences                                                                               |
|                            | Switch to phone visits - due to patient technology challenges | A switch from a virtual visit to a phone visit is often due to patient technology challenges (internet connection not strong enough, can't figure out apps, etc.) |
|                            | Older patients want phone due to transportation               | Older patients want phone visits due to how challenging it can be in getting transportation to the clinic                                                         |
|                            | Tech barriers discovered through prior experiences            | Clinics sometimes know a patient has had a previous challenging virtual visit experience, so this is how they identify they might experience challenges again     |
|                            | Some conditions not a good fit for virtual visits             | Some medical conditions, such as related to psychiatry (e.g. paranoia), lead patients to not want virtual visits                                                  |
|                            | Young people not able to do virtual visits                    | Some young people are not able to do virtual visits, such as those with low resource access and those who have not experienced the internet much                  |
| Clinic staff interventions | Prep call ahead of visit - mixed value for patients           | Some patients had positive experiences, while others didn't want, a prep phone call ahead of a virtual visit                                                      |
|                            | MAs important role                                            | MAs play an important role in helping patients prepare for virtual visits                                                                                         |
|                            | MA's logging into MyChart                                     | MAs find that they need to log into MyChart to "see" what the patient is seeing                                                                                   |
|                            | Clinics using algorithm                                       | Clinics are using an algorithm for scheduling that matches visit type with the appropriate modalities. Virtual is often what's first                              |
|                            | Calling patients more helpful                                 | Calling patients for help with virtual visits is better than providing them with resources                                                                        |
|                            | Want algorithm for troubleshooting                            | Want a workflow/algorithm for helping patients troubleshoot through technology issues                                                                             |
| Support considerations     | Troubleshooting difficult over the phone                      | Troubleshooting virtual visit access issues can be difficult when doing so over the phone                                                                         |
| Future intervention ideas  | Can provide resources during in-person visits                 | Clinics can provide resources for virtual visits during in-person visits                                                                                          |

|                |                                             |                                                                                                                                                                       |
|----------------|---------------------------------------------|-----------------------------------------------------------------------------------------------------------------------------------------------------------------------|
|                | Home visits helpful                         | Home visits to help patients get their technology working would be helpful                                                                                            |
|                | Help in clinic                              | Would be helpful to help patients with tech issues in the clinic, so they could then do a virtual visit on their own                                                  |
|                | Patients feel isolated                      | Some patients feel isolated from the community, a home visit to help with tech and other SDOH would help with isolation                                               |
|                | Kiosks in local libraries                   | Setting up kiosks in local libraries for patients in rural areas, for conducting virtual visits, might help patients                                                  |
|                | Share resource guide during their visits    | Most helpful to mention and share resource guide during in-person visits                                                                                              |
|                | How many patients experience barriers?      | Would be helpful to know what proportion of patients are experiencing barriers. Is there a large enough proportion to warrant time and energy to addressing barriers? |
|                | Flag in Epic not helpful                    | Flag in Epic - to identify patients who might be at risk of not having a successful virtual visits - would not be helpful                                             |
|                | Flag could be helpful                       | Flag in Epic - to identify patients who might be at risk of not having a successful virtual visits - could be helpful                                                 |
|                | Trial run could help                        | Trial run of a virtual visit could help prepare some patients                                                                                                         |
|                | Call day ahead could be helpful             | Calling a patient the day ahead to help with virtual visit set up could be helpful                                                                                    |
| Resource guide | Resource guide helpful                      | Resource guide for patients with info about how to access devices and broadband, could be helpful                                                                     |
|                | Resource guide as a brochure                | Resource guide as a brochure for patients would be helpful                                                                                                            |
|                | Not sure if resource guide helpful          | Not sure if resource guide would be helpful - don't serve many patients who are not able to do virtual visits                                                         |
|                | Share resource guide during scheduling call | Could patients to explain the resource guide during a scheduling call, if time can be allocated for this                                                              |
